# Supplementary material for: Clustering of hydroxyapatite on a super-twisted collagen microfibril under mechanical tension
Source: Royal Society of Chemistry journal article supplement (doi:10.1039/c6tb02835g), 2017-01-01
Supplement: c6tb02835g1.pdf [file c6tb02835g1.pdf]

Supplementary Information

# Clustering of Hydroxyapatite on Super-Twisted Collagen Microfibril under Mechanical Tension

**Zhong Zhou, Dong Qian, Majid Minary-Jolandan<sup>\*,\*\*</sup>**

Department of Mechanical Engineering, <sup>\*\*</sup> Alan G. MacDiarmid NanoTech Institute  
The University of Texas at Dallas, 800 W. Campbell R., Richardson, TX 75080, USA

\*Email: [majid.minary@utdallas.edu](mailto:majid.minary@utdallas.edu)

**Supplementary Table S1.** Force field parameters of HAP.

| Atom        | Charge <sup>1</sup> | Non-bonded van der Waals parameters <sup>2, 3</sup>                  |
|-------------|---------------------|----------------------------------------------------------------------|
| Ca          | +2.0                | $\varepsilon = 0.496$ kJ/mol, $\sigma = 0.294$ nm                    |
| P           | +2.6                | $\varepsilon = 2.447$ kJ/mol, $\sigma = 0.349$ nm                    |
| O(P)        | -1.4                | $\varepsilon = 1.054$ kJ/mol, $\sigma = 0.303$ nm                    |
| O(H)        | -1.6                | $\varepsilon = 0.490$ kJ/mol, $\sigma = 0.309$ nm                    |
| H           | +0.6                | $\varepsilon = 0.192$ kJ/mol, $\sigma = 0.140$ nm                    |
| Bond type   |                     | Bond parameters <sup>2, 4</sup>                                      |
| P-O stretch |                     | $r_0 = 0.157$ nm, $k_b = 359824$ kJ/mol/nm <sup>2</sup>              |
| O-P-O bend  |                     | $\theta_0 = 109.5^\circ$ , $k_\theta = 1046$ kJ/mol/rad <sup>2</sup> |
| O-H stretch |                     | $r_0 = 0.096$ nm, $k_b = 438767$ kJ/mol/nm <sup>2</sup>              |

In Table S1,  $\varepsilon$  is the depth of the potential well of Lennard-Jones potential, and  $\sigma$  is the distance at which the van der Waals potential is zero.

$$\text{Lennard-Jones potential: } V_{LJ} = 4\varepsilon \left[ \left( \frac{\sigma}{r} \right)^{12} - \left( \frac{\sigma}{r} \right)^6 \right]$$

$r_0$  is the equilibrium bond length for covalent bond stretching, and  $k_b$  is the force constant.

$\theta_0$  is the equilibrium bond angle for covalent bond angle bending, and  $k_\theta$  is the force constant.

Refer to GROMACS<sup>5</sup> and its manual for the formulations of the potential functions.

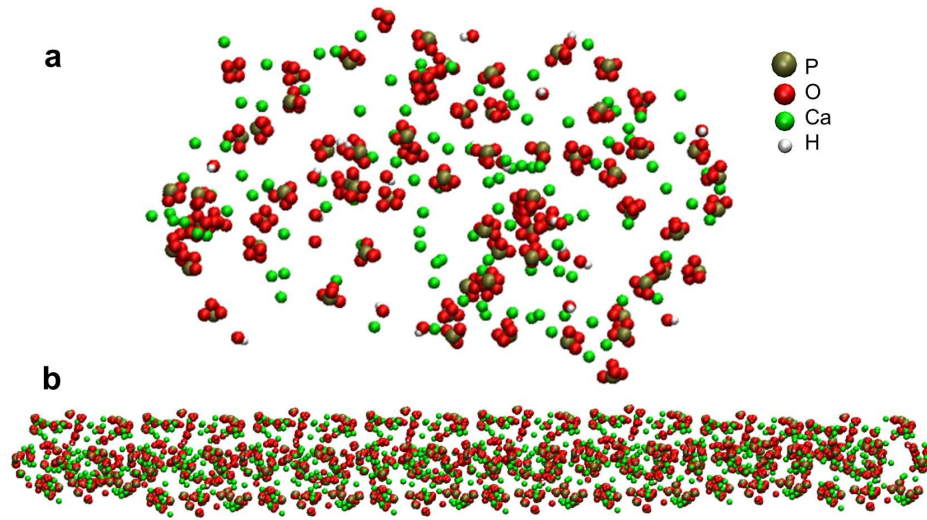

**Supplementary Figure S1.** Discrete HAP ion systems for building collagen microfibril-HAP composite. **(a)** Equivalent to 12 unit cells of HAP. **(b)** Equivalent to 96 unit cells of HAP, in the final model of collagen microfibril-HAP composite.

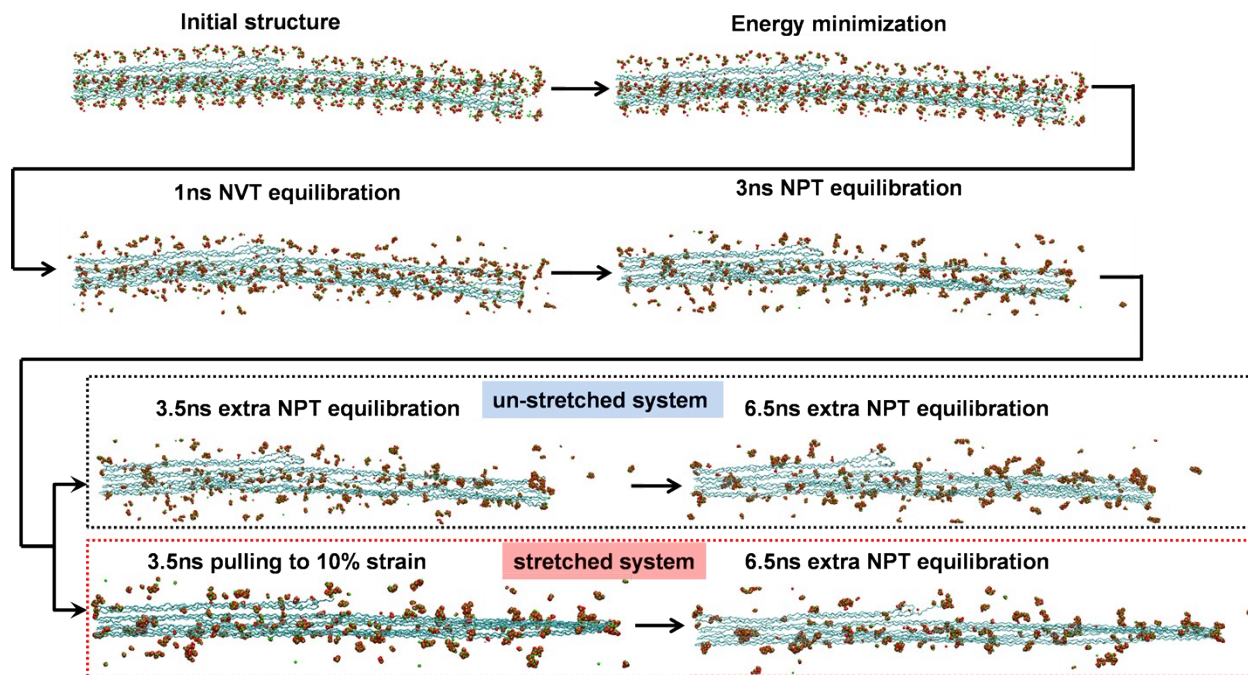

*Supplementary Figure S2. Flow chart of simulation stages, with atomic configuration at the end of each stage.*

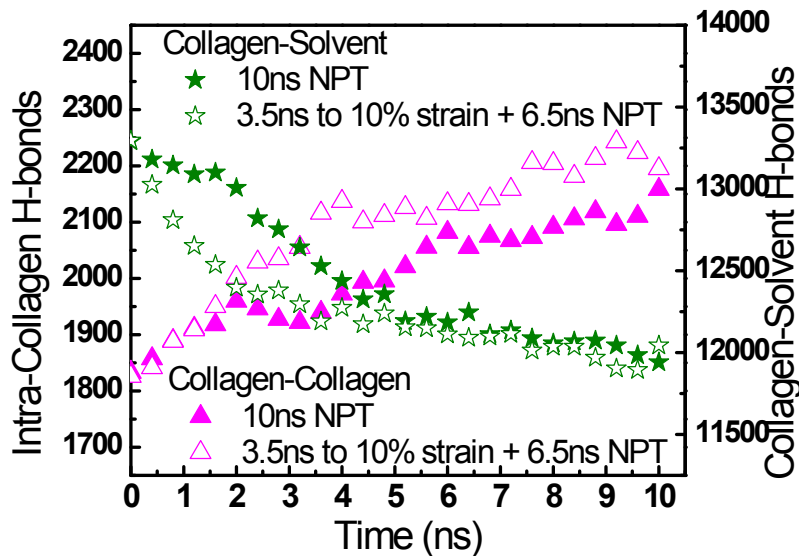

**Supplementary Figure S3.** Comparison of number of hydrogen bonds within collagen and between collagen and water, for two systems at the same simulation time (one un-stretched configuration during 10 ns extra equilibration, and one configuration stretched for 3.5 ns to 10% followed by 6.5 ns extra equilibration).

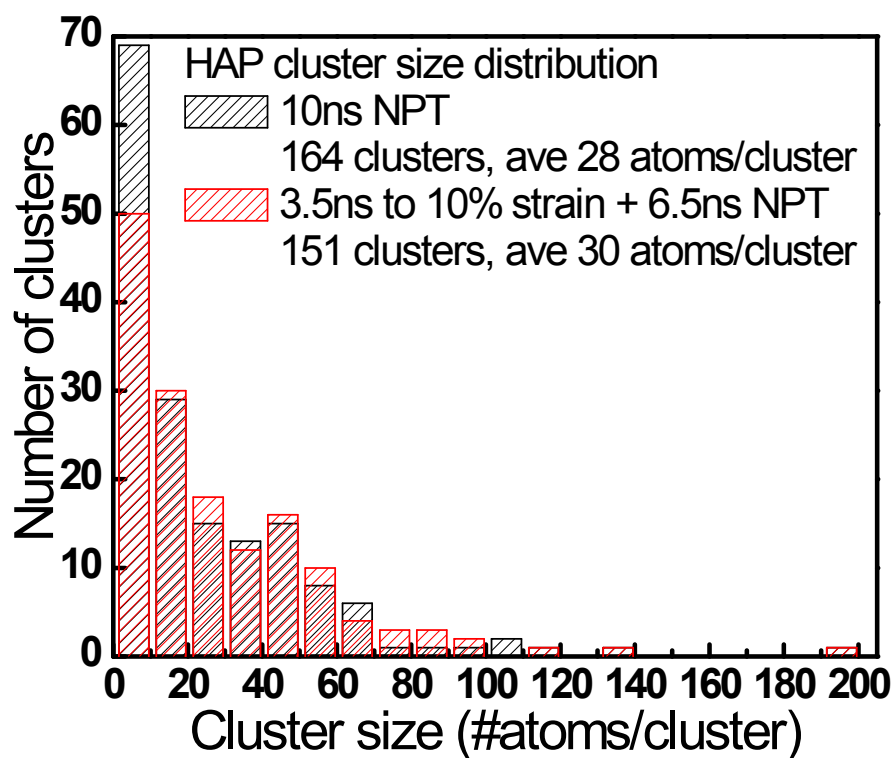

*Supplementary Figure S4. Histograms of the HAP cluster size distribution of the two configurations (after 10 ns extra NPT vs after 3.5 ns stretching to 10% plus 6.5 ns extra NPT). The abscissa is the cluster size intervals, and the ordinate is the number of clusters in each interval.*

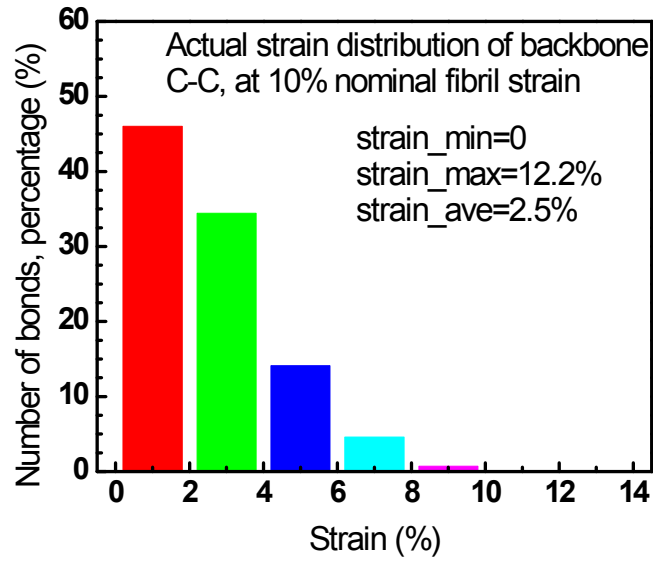

**Supplementary Figure S5.** Distribution of actual tensile strain of backbone C-C bonds, at nominal engineering strain of 10% in collagen microfibril. The majority (over 80%) of the C-C bonds experienced a strain less than 4%, and only 3 out of 3013 C-C bonds had a strain larger than 10%.

**Supplementary Movies.** 2 movies are available in the SI. These movies show the following:

**Movie S1.** Uniaxial tension of a D-period collagen microfibril and HAP cluster formation, followed by extra equilibration. For collagen microfibril, the final strain is 10% at 3.5 ns, and the pulling rate is 0.002 nm/ps. During 6.5 ns extra equilibration, collagen microfibril is kept at 10% strain by only fixing the N- and C- termini. Collagen chains are in cyan. In HAP minerals, Ca is in Green, P in Gold, O in Red, and H in White.

**Movie S2.** 10 ns extra equilibration of a D-period collagen microfibril and HAP model, without mechanical stretching. Collagen chains are in cyan. In HAP minerals, Ca is in Green, P in Gold, O in Red, and H in White.



## Supplementary References

### References

1. S. Hauptmann, H. Dufner, J. Brickmann, S. M. Kast and R. S. Berry, *Physical Chemistry Chemical Physics*, 2003, **5**, 635-639.
2. R. Bhowmik, K. S. Katti and D. Katti, *Polymer*, 2007, **48**, 664-674.
3. R. B. Best, X. Zhu, J. Shim, P. E. M. Lopes, J. Mittal, M. Feig and A. D. MacKerell, *Journal of Chemical Theory and Computation*, 2012, **8**, 3257-3273.
4. T.-J. Lin, *PhD dissertation, Department of Polymer Engineering, The University of Akron*, 2013.
5. H. J. C. Berendsen, D. van der Spoel and R. van Drunen, *Computer Physics Communications*, 1995, **91**, 43-56.
